# Supplementary material
Source: publisher site journal article supplement (https://www.dovepress.com/article/520760)
Supplement: Supplementary file 1 [file 520760.docx]

Table 1s

**The Questionnaire Utilized in This Study**

Do you agree to participate in this study?

Yes

No

Please select your citizenship:

Saudi

Non-Saudi

1. What is your age?
2. Under 18
3. 18-24
4. 25-34
5. 35-44
6. 45-54
7. Over 55
8. What is your gender?
9. Male
10. Female
11. What is the highest degree or level of school you have

completed? If you're currently enrolled in school, please indicate the highest degree you have received.

1. High school degree or equivalent
2. Bachelor's degree
3. Master's degree
4. Doctorate
5. What is your current employment status?
6. Employed
7. Unemployed
8. Retired
9. What is your current employment status?
10. Not working
11. I am working in the clinic as a respiratory therapist
12. I am working as an academician/researcher at a University
13. Have you previously published an article in a peer-reviewed journal?
14. Yes
15. No
16. If you have published before, how many peer-reviewed publications do you have? (Not just as first-author)

……

Not working

I am working in the clinic as a respiratory therapist

I am working as an academician/researcher at a University

| Statement | Strongly Agree | Agree | Neutral | Disagree | Strongly Disagree |
| --- | --- | --- | --- | --- | --- |
| INSTITUTIONAL FACTORS | | | | | |
| My institution does not have enough recourses |  |  |  |  |  |
| My institution has poor repository of past research outcomes |  |  |  |  |  |
| My institution has limited number of students and/or lack of student interest |  |  |  |  |  |
| My institution has limited number of faculty/staffs |  |  |  |  |  |
| My institution has limited access to databases |  |  |  |  |  |
| PERSONAL FACTORS | | | | | |
| I do have enough time to conduct research |  |  |  |  |  |
| I am focused on clinical tasks rather than research |  |  |  |  |  |
| I do not have enough experience to conduct research |  |  |  |  |  |
| I do have the required skills to conduct research |  |  |  |  |  |
| I do have the interest and motivation to conduct research |  |  |  |  |  |
| I only want to conduct high-impact research |  |  |  |  |  |
| WORKPLACE FACTORS | | | | | |
| My workplace culture does support conducting research |  |  |  |  |  |
| My workplace does not have enough role models |  |  |  |  |  |
| My workplace lacks senior enthusiasm to conduct research |  |  |  |  |  |
| There is an administrative overload that limit my research |  |  |  |  |  |
| There is a teaching/supervising overload that limit my research |  |  |  |  |  |
| Lack of time and dedicated work hours |  |  |  |  |  |
| Lack of incentive and recognition |  |  |  |  |  |

Open ended questions:

- Describe in your own words the main barriers to conducting research?
- Describe what is the right solution to overcome this problem?
- How’s organizational recognition help you to conduct research?
